# Supplementary material
Source: PubMed Central journal article supplement (PMC3131875)
Supplement: cdd201077x1.pdf [file cdd201077x1.pdf]

## **SUPPLEMENTARY FIGURE LEGENDS**

**Supplementary figure 1.** Positive regulation of PML-NBs by SIRT1. MEFs derived from mice with different SIRT1 gene dosage were grown on coverslips and at 24 h cells were subjected to immunostaining using anti-PML antibody followed by confocal microscopy. To facilitate comparison, photomicrographs of each cell type were prepared using identical microscope settings and exposure times. PML staining in a representative image of cells expressing different SIRT1 levels are shown.

**Supplementary figure 2.** SIRT1 promotes the sumoylation of HA-PML in a deacetylase-independent manner. HEK-293 cells were transfected with the indicated plasmids. 48 h after transfection whole cell lysate was recovered and purification of His-SUMO1 conjugated proteins by nickel affinity chromatography was performed. Purified His-SUMO1-conjugated HA-PML was probed with anti-SUMO1 and anti-HA antibodies. Input extracts were probed with anti-HA (Roche), anti-SIRT1, anti  $\beta$ -galactosidase and anti-tubulin antibodies as indicated.

**Supplementary figure 3.** Total HA-Sp100 or SUMO1-conjugated Sp100 protein levels are not affected by the expression of SIRT1. HEK-293 cells were transfected with the indicated plasmids. 48 h after transfection whole cell lysates were recovered and purification of His-SUMO1 conjugated proteins by nickel affinity chromatography was performed. Purified His-SUMO1-conjugated HA-Sp100 was probed with anti-HA antibody (upper panel). Input extracts were probed with anti-HA, anti-FLAG, anti  $\beta$ -galactosidase and anti-tubulin antibodies as indicated.

**Supplementary figure 4.** Analysis of VSV protein synthesis in cells with different SIRT1 gene dosage. SIRT1<sup>-/-</sup>, WT or SIRT1-tg MEFs were infected with VSV at MOI of 5 and at the indicated times, Western-blot analysis, using antibodies against both the M and N protein from VSV, was performed.

**Supplementary figure 5.** Both SIRT1-WT and the acetylation mutant SIRT1 H363Y coimmunoprecipitate with PML. HEK-293 cells were transfected with the indicated plasmids, and immunoprecipitations using anti-FLAG, anti-HA and a control antibody (C) in cell lysates prepared 48h after transfection were performed. Input extracts were probed with anti-HA and anti-FLAG antibodies as indicated (left panel).

**Supplementary figure 6.** SIRT1 sumoylation *in vitro*. *In vitro* sumoylation assay was performed with [<sup>35</sup>S]-labeled in vitro-translated SIRT1 and incubated in a sumoylation mix containing (+) or not (-) SUMO1 as indicated.

**Supplementary figure 7.** SIRT1 does not affect the desumoylation of PML by SENP1. [<sup>35</sup>S]-labeled SUMO1-PML protein obtained by in vitro sumoylation assay was incubated with 2 µg recombinant SENP1 in 30 µl reaction buffer containing 50 mM Tris (pH 7.5), 2 mM MgCl<sub>2</sub> and 5 mM β-mercaptoethanol in the absence (-) or presence (+) of *in vitro* sumoylated SIRT1 as indicated. Reactions were incubated at 37°C for 1 h, and terminated with SDS sample buffer.

**Supplementary figure 8.** The levels of free non-conjugated SUMO1 are not affected by overexpression of SIRT1. MCF7 cells were transfected with SUMO1 and increasing doses of FLAG-SIRT1 as indicated and cellular extracts obtained 48 h after transfection

were analyzed by Western-blot with anti-SUMO1 antibody. Asterisk indicates a nonspecific band.

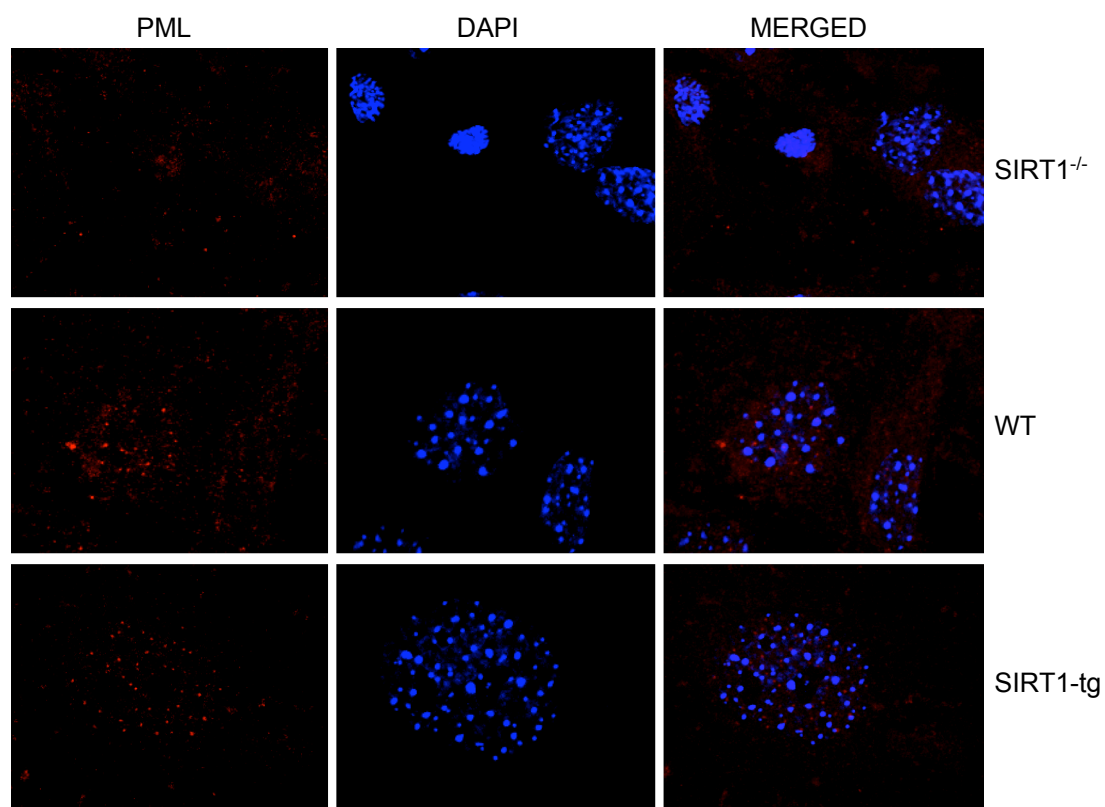

**Supplementary Figure 1. Campagna et al., 2009**

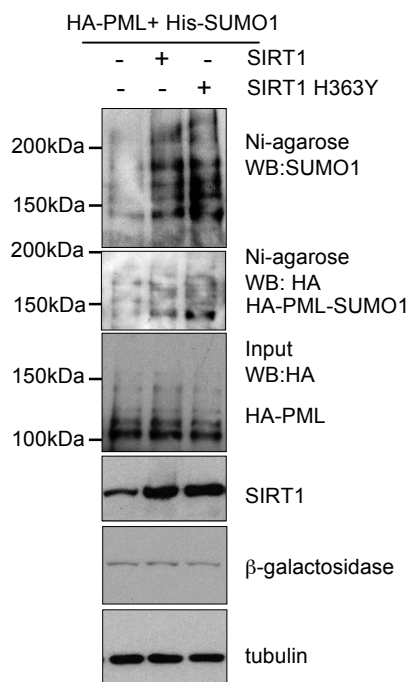

**Supplementary Figure 2. Campagna et al., 2009**

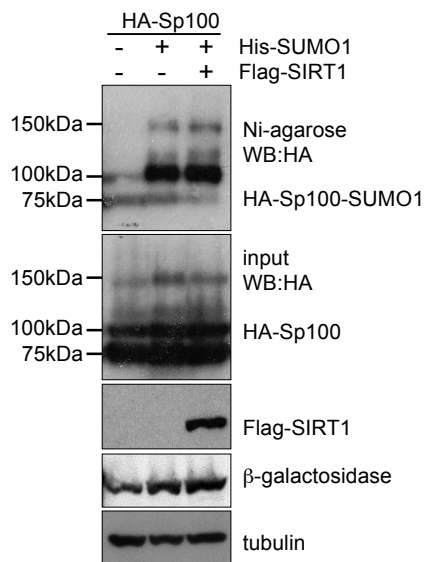

**Supplementary Figure 3. Campagna et al., 2009**

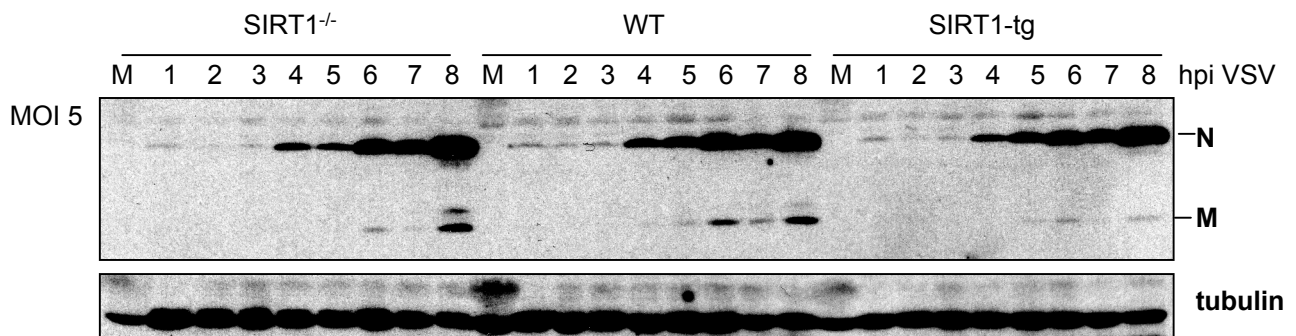

**Supplementary Figure 4. Campagna et al., 2009**

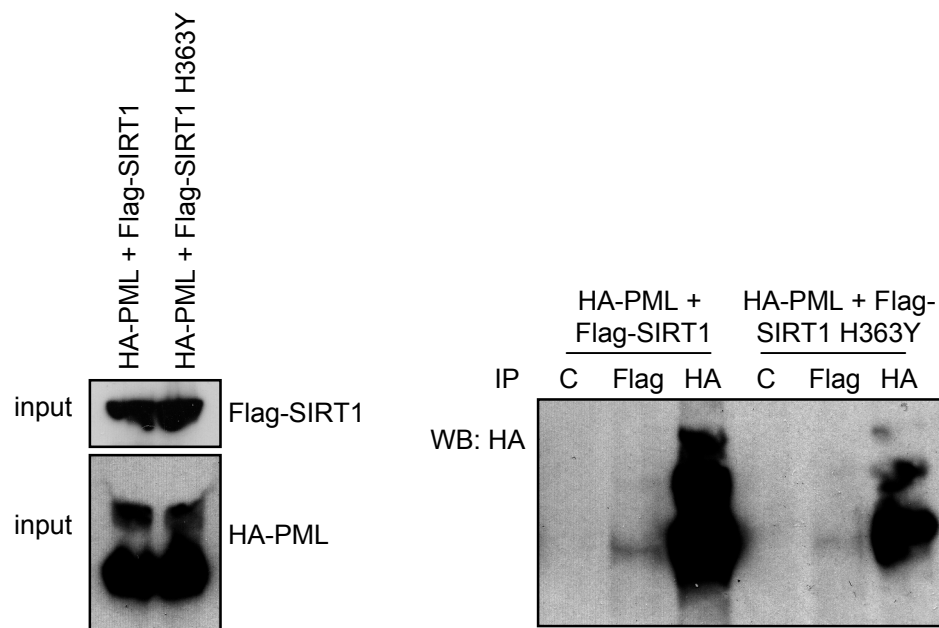

**Supplementary Figure 5. Campagna et al., 2009**

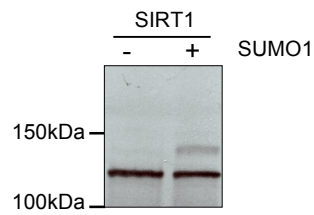

**Supplementary Figure 6. Campagna et al., 2009**

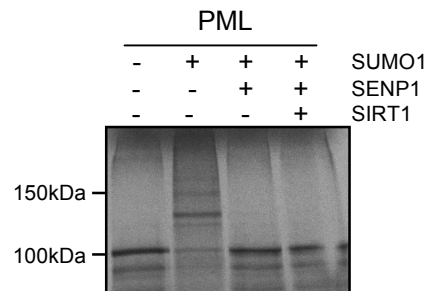

**Supplementary Figure 7. Campagna et al., 2009**

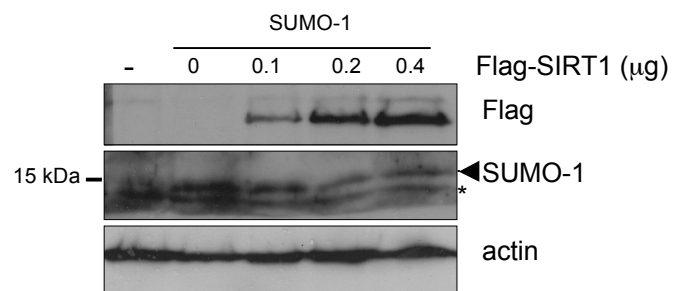

**Supplementary Figure 8. Campagna et al., 2009**
